# Supplementary material for: Chemical Composition and Biological Activity of Commelina erecta: An Edible Wild Plant Consumed in Brazil
Source: MDPI journal article supplement (doi:10.3390/foods12010192), 2023-01-01
Supplement: s1 [file s1]

# Chemical Composition and Biological Activity of *Commelina erecta*: An Edible Wild Plant Consumed in Brazil

Lucas Vinicius Cavichi <sup>1,2,3</sup>, Ângela Liberal <sup>1,2</sup>, Maria Inês Dias <sup>1,2</sup>, Filipa Mandim <sup>1,2</sup>, José Pinela <sup>1,2</sup>, Marina Kostić <sup>4</sup>, Marina Soković <sup>4</sup>, Daneysa Lahis Kalschne <sup>3</sup>, Ângela Fernandes <sup>1,2,\*</sup>, Cristiane Canan <sup>3</sup>, Lillian Barros <sup>1,2</sup> and Joana S. Amaral <sup>1,2</sup>

<sup>1</sup> Centro de Investigação de Montanha (CIMO), Instituto Politécnico de Bragança, Campus de Santa Apolónia, 5300-253 Bragança, Portugal; lucascavichi@hotmail.com (L.V.C.); angela.liberal@ipb.pt (Â.L.); maria.ines@ipb.pt (M.I.D.); filipamandim@ipb.pt (F.M.); jpinela@ipb.pt (J.P.); lillian@ipb.pt (L.B.); jamaral@ipb.pt (J.S.A.)

<sup>2</sup> Laboratório Associado para a Sustentabilidade e Tecnologia em Regiões de Montanha (SusTEC), Instituto Politécnico de Bragança, 5300-253 Bragança, Portugal

<sup>3</sup> Department of Food Sciences, Federal Technological University of Paraná, Medianeira 85884-000, Brazil; daneysa@hotmail.com (D.L.K.); cristianecanan@gmail.com (C.C.)

<sup>4</sup> Institute for Biological Research "Siniša Stanković"-National Institute of Republic of Serbia, University of Belgrade, 11000 Belgrade, Serbia; marina.kostic@ibiss.bg.ac.rs (M.K.); mris@ibiss.bg.ac.rs (M.S.)

\* Correspondence: afeitor@ipb.pt

**Table S1.** Proximal composition, moisture and energy value of frequently consumed WEPs in Brazil (data adapted from references [35–37]).

|                                             | Moisture<br>(g/ 100 g fw <sup>1</sup> ) | Lipids<br>(g/ 100 g fw) | Protein<br>(g/ 100 g fw) | Carbohydrates<br>(g/ 100 g fw) | Energy<br>(kcal/100g fw) | Reference |
|---------------------------------------------|-----------------------------------------|-------------------------|--------------------------|--------------------------------|--------------------------|-----------|
| <i>Eruca vesicaria</i> ssp<br>(Arugula)     | 91.71                                   | 0.66                    | 2.58                     | 3.65                           | 25.00                    | [36]      |
| <i>Pereskia aculeata</i><br>(Ora-pro-nóbis) | 88.09                                   | 0.30                    | 3.10                     | 5.01                           | 35.14                    | [37]      |
| <i>Portulaca oleracea</i><br>(Purslane)     | 92.86                                   | 2.03                    | 3.39                     | 0.36                           | 20.00                    | [36]      |
| <i>Spilanthes oleracea</i> L.<br>(Jambu)    | 88.60                                   | 0.25                    | 3.08                     | 5.30                           | 35.86                    | [35]      |

<sup>1</sup> fw – fresh weigh.

## References:

35. Aguiar, J.P.L.; Yuyama, L.K.O.; Souza, F. das C. do A.; Pessoa, A. Biodisponibilidade do ferro do jambu (*Spilanthes oleracea* L.): estudo em murinos. *Rev. Pan-Amazônica Saúde* **2014**, *5*, 19–24.
36. Duarte, J.M.; Areco, K.C.N. Tabela de Composição Química Dos Alimentos. <http://tabnut.dis.epm.br/Credito> (accessed on November 14, 2022)
37. Queiroz, C.R.A. dos A.; Melo, C.M.T.; Andrade, R.R.; Pavani, L.C.; Morais, S. a. L. *34a Reunião Anual da Sociedade Brasileira de Química*. Instituto Federal do Triângulo Mineiro (IFTM) Campus Uberlândia, Brazil, 2009.
